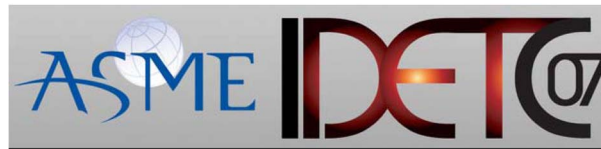

**2007 ASME International Design Engineering Technical Conferences (IDETC2007)**  
**September 4–7, 2007**

**Rio All-Suite Hotel & Casino, Las Vegas, Nevada, USA**

On behalf of the ASME Design Engineering and Computers in Engineering Divisions, it is our great pleasure to invite you to attend and contribute to the 2007 ASME International Design Engineering Technical Conferences (IDETC) which will take place on September 4–7, 2007, at the Rio All-Suite Hotel & Casino in Las Vegas, Nevada. Las Vegas is easily accessible from anywhere in the world and combines the best of outdoor adventure and modern amenities. The conferences will also include plenary sessions, keynote lectures, and tutorials on different topics related to engineering design. A summary of these conferences is provided here:

1. 21st Biennial Conference on Mechanical Vibration and Noise (VIB)
2. 27th Computers and Information in Engineering Conference (CIE)
3. 2007 ASME/IEEE International Conference on Mechatronic and Embedded Systems and Applications (MESA07)
4. 6th International Conference on Multibody Systems, Nonlinear Dynamics, and Control (MSNDC)
5. 33rd Design Automation Conference (DAC)
6. 10th ASME International Power Transmission and Gearing Conference (PTG)
7. 19th Reliability, Stress Analysis, and Failure Prevention Conference (RSAFP)
8. 31st Mechanisms and Robotics Conference (MECH)
9. 1st International Conference on Micro- and Nano-systems (MNS)
10. 4th Symposium on International Design and Design Education (DEC)
11. 19th International Conference on Design Theory and Methodology (DTM)
12. <sup>1</sup>12th Design for Manufacturing and the Life Cycle Conference (DFMLC)

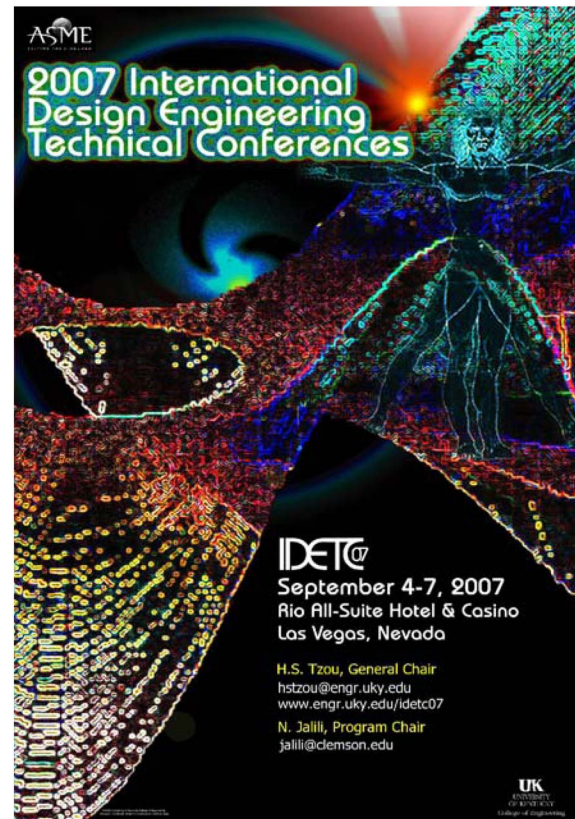

**Horn-Sen (H.-S.) Tzou**  
 IDETC 2007 General Conference Chair  
 University of Kentucky  
 e-mail: hstzou@engr.uky.edu

**Nader Jalili**  
 IDETC 2007 Technical Program Chair  
 Clemson University  
 e-mail: jalili@clemson.edu

<sup>1</sup><http://www.asmeconferences.org/IDETC07/> or <http://www.engr.uky.edu/IDETC07/>
